# Supplementary material for: Evaluation of Novel B1R/B2R Agonists Containing TRIOZAN™ Nanoparticles for Targeted Brain Delivery of Antibodies in a Mouse Model of Alzheimer Disease
Source: MDPI journal article supplement (doi:10.3390/molecules28135206), 2023-07-04
Supplement: s1 [file s1]

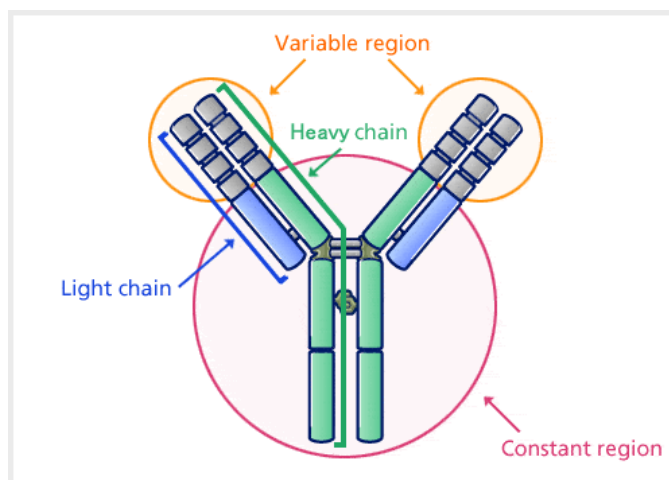

Heavy chain (51.15 kDa)

MDRLTSS~~FLLIVPAYVLS~~QVQLQQPGAELVKPGASVKLSCKSSGYHFTSYWMHWVKQRPQGQLEWIGVIHPNSGSIN  
 YNEKFESKATLTVDKSSSTAYMQLSSLTSEDSAVYYCAGERDSTEVLPMDYWGQGTSTVTVSSAKTTPPSVYPLAPGSAA  
 QTNSMVTLGCLVKGYFPEPVTVTWNSGSLSSGVHTFPAVLES~~DLYTLSSSVTPSSPRPSETVTCNVAHPASSTKVDKKI~~  
 VPRDCGCKPCICTVPEVSSVFIFPPKPKDVLITITLTPKVTCTVVDISKDDPEVQFSWFVDDVEVHTAQTQPREEQFNSTF  
 RSVSELPIMHQDWLNGKEFKCRVNSAAFPAPIEKTISKTKGRPKAPQVYTIPPPKEQMAKDKVSLTCMITDFFPEDITVE  
 WQWNGQPAENYKNTQPIMNTNGSYFVYSKLNQKSNWEAGNTFTCSVLHEGLHNHHTEKSLSHSPGK

Light chain (25.92 kDa)

MRFQVQVLG~~LLLLWISGAQC~~DVQITQSPSYLAASPGETITINCRASKSINKYLAWYQEKP~~GKTNKLLI~~YSGSTLQSGIPSR  
 FSGSGSGTDFTLT~~ISSLEPEDFAMYYCQQHNEYPLTFGAGTKLELKRADAAPT~~VSIFPPSSEQLTSGGASVVCFLNNFY~~PK~~  
 DINVKWKIDG~~SERQNGVLNSWTDQDSK~~STYSMSSTLT~~LTKDEYERHNSYTCEATHKTST~~SPIVKSFNRNEC

**Supplementary Figure S1.** Schematic representation and amino acid sequence of the mAbs ANX-M1. The selected peptide sequence for the quantitative LC-MS/MS analysis of ANX-M1 is indicated in green.

#### **F4. TMC-B1R-DS-TPP (mAb + B2R agonist)**

Z-ave =  $165.6 \pm 5.5$  nm

PdI =  $0.213 \pm 0.004$

Dh (number mean) =  $69.4 \pm 15.3$  nm

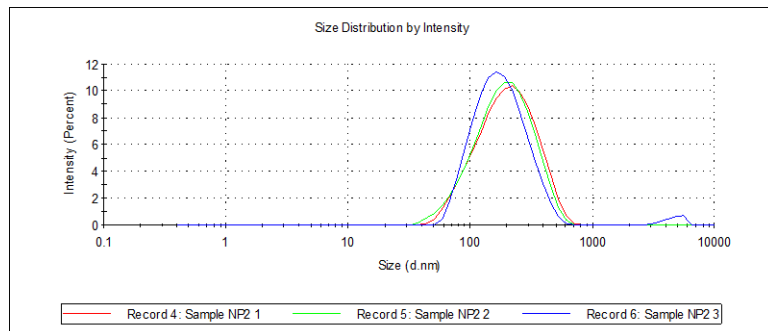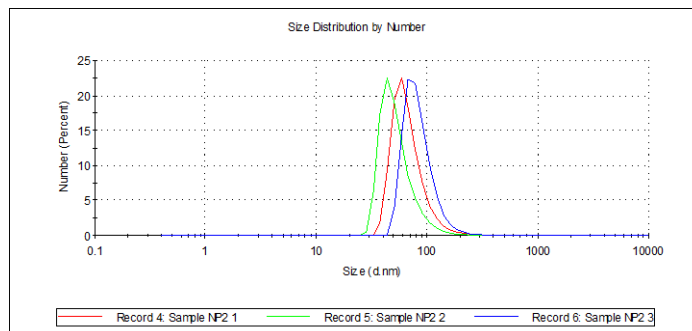

#### **F6. TMC-DS-TPP (mAb + B1R + B2R)**

Z-ave =  $132.4 \pm 2.3$  nm

PdI =  $0.144 \pm 0.006$

Dh (number mean) =  $79.2 \pm 7.3$  nm

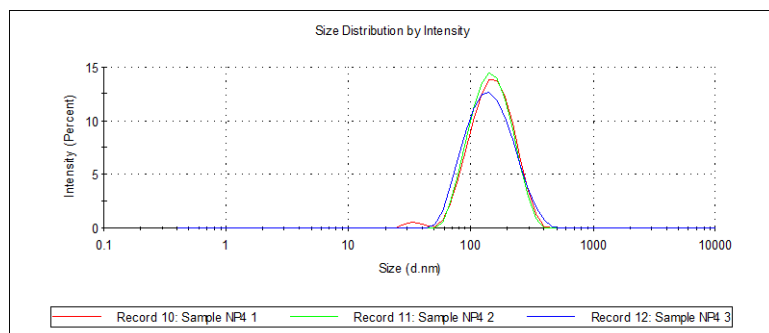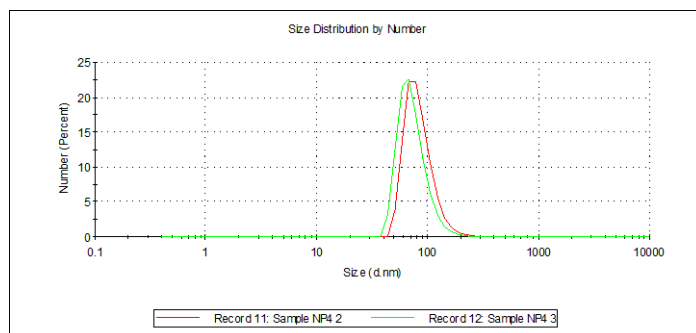

**Supplementary Figure S2.** Representative DLS graphs for the nanoformulations F4 and F6.
